# Supplementary material for: A pH-Sensitive Peptide-Containing Lasso Molecular Switch
Source: Molecules. 2013 Sep 17;18(9):11553–75. doi: 10.3390/molecules180911553 (PMC6270336; doi:10.3390/molecules180911553)

## Supplementary Materials

**Figure S1.** Compound **8**:  $^1\text{H}$ -NMR,  $\text{CD}_3\text{OD}$ , 298 K, 600 MHz.

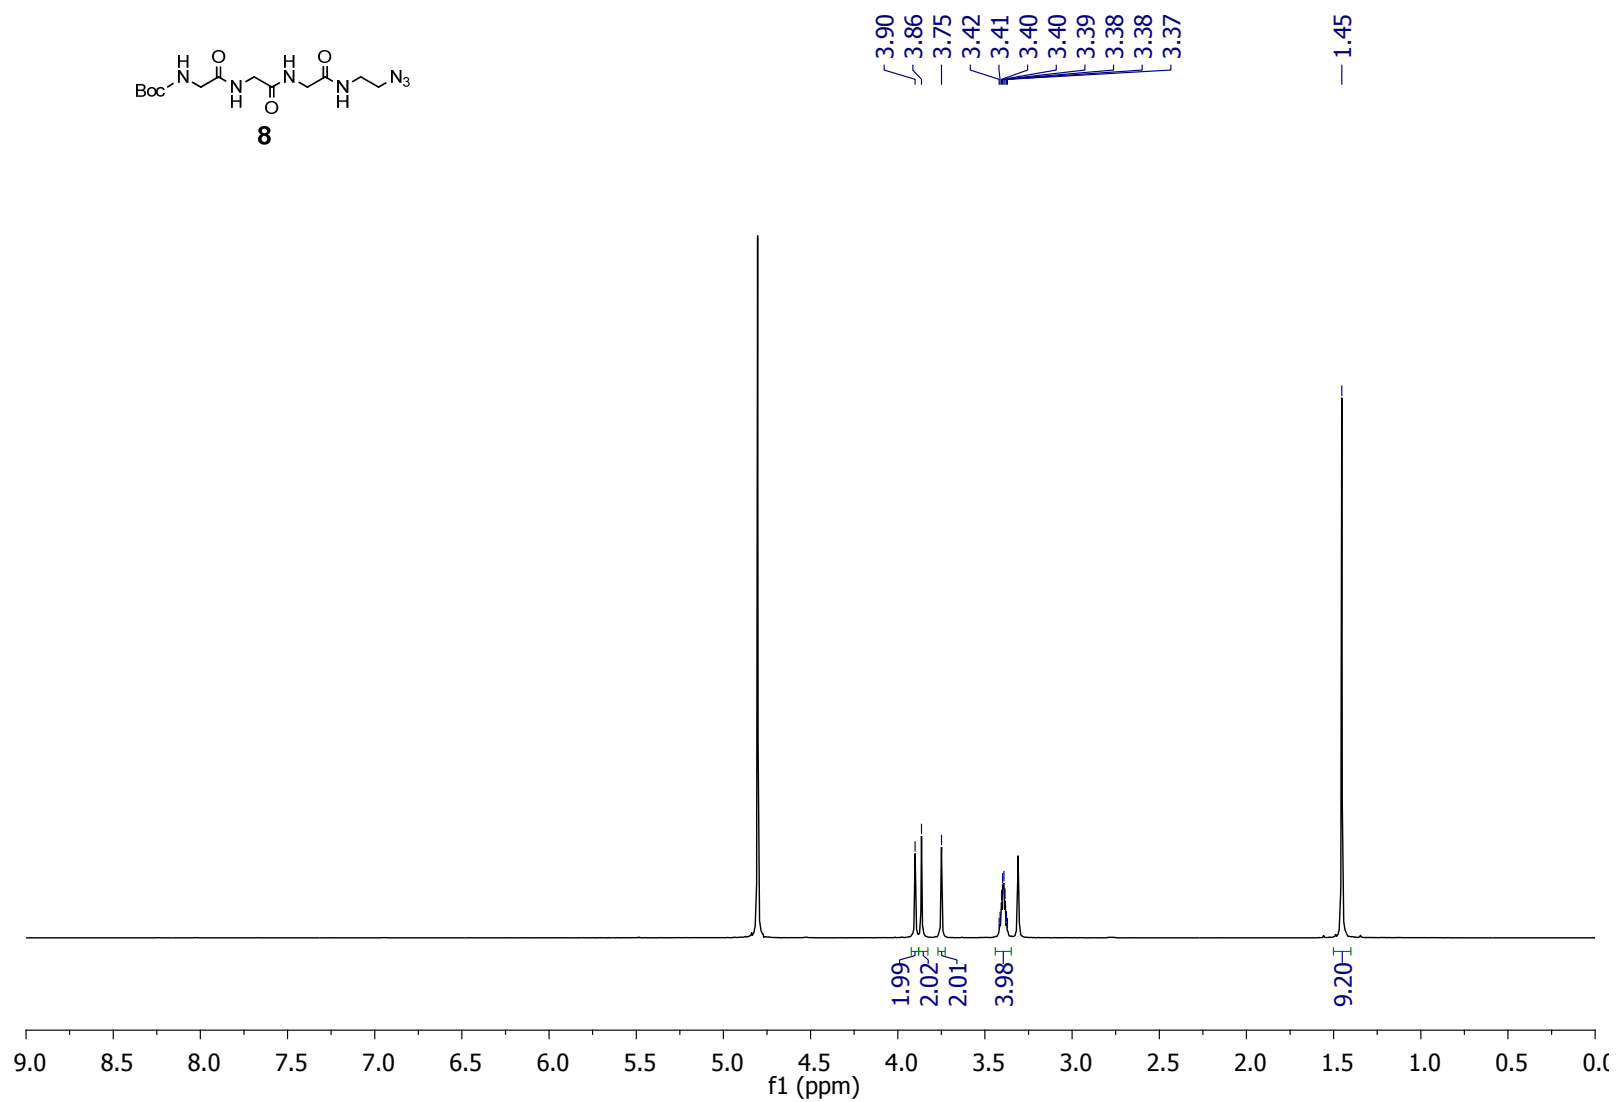

**Figure S2. Compound 8:**  $^{13}\text{C}$ -NMR,  $\text{CD}_3\text{OD}$ , 298 K, 150 MHz.

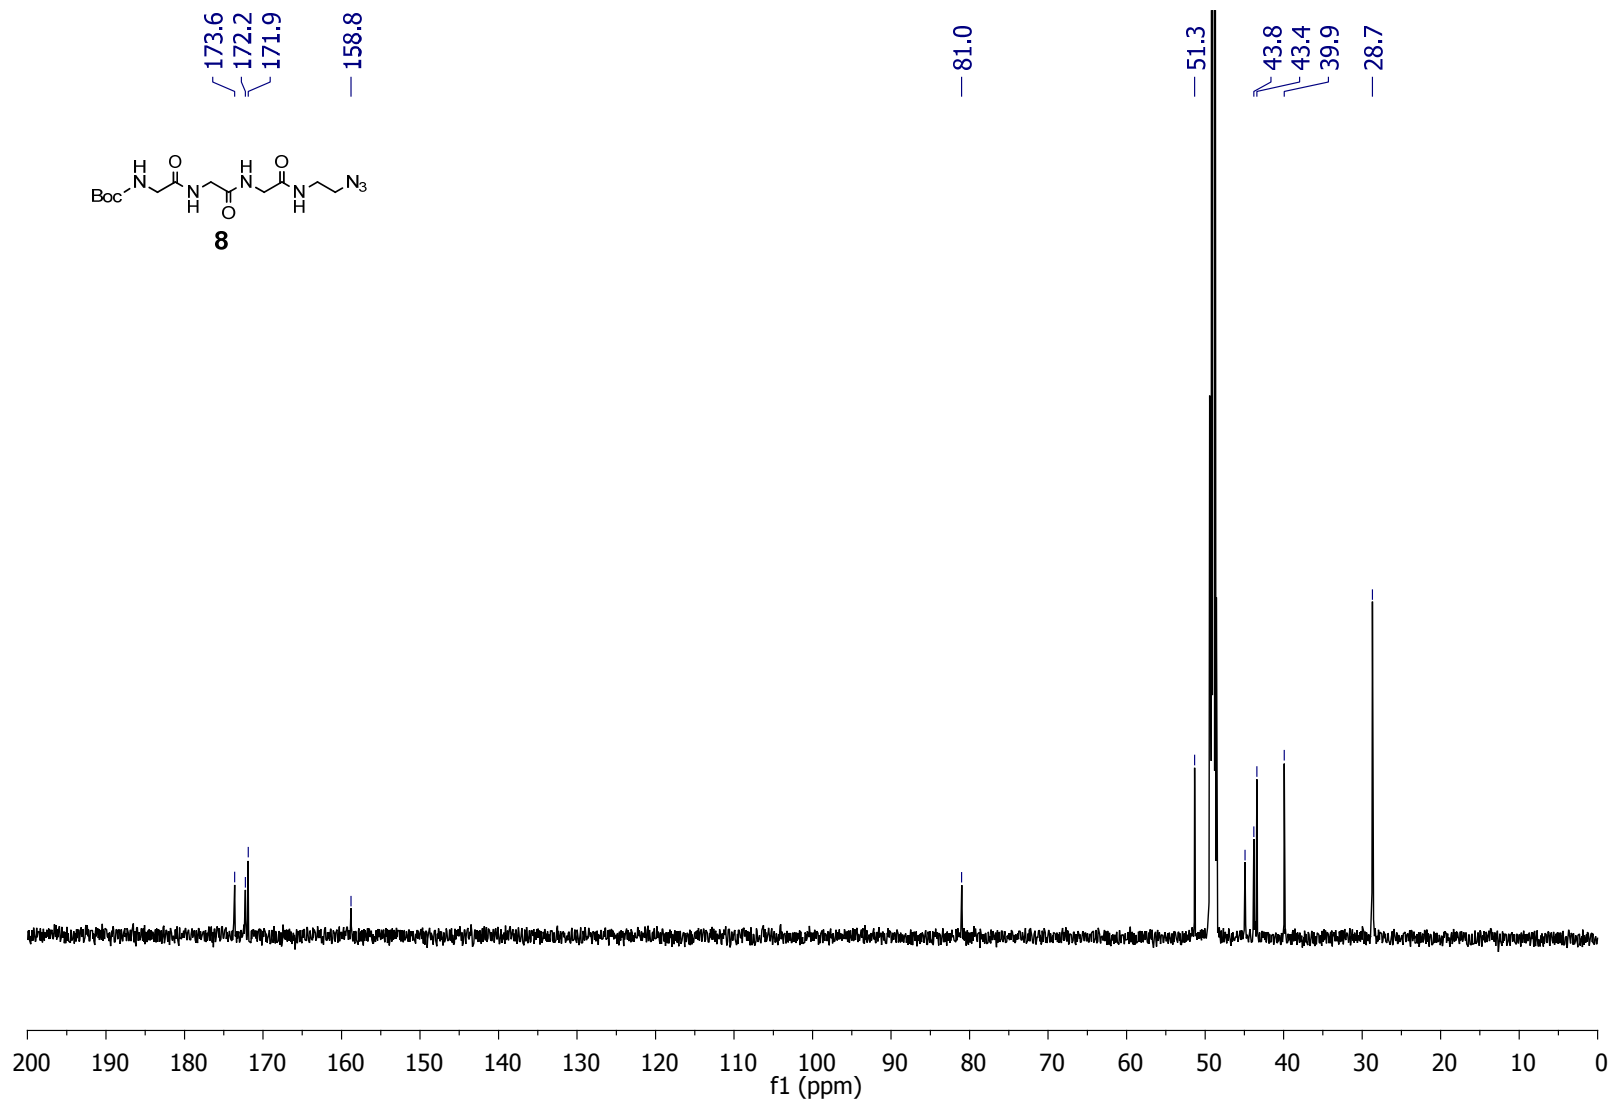

**Figure S3.** Compound **9**:  $^1\text{H}$ -NMR,  $\text{CD}_3\text{OD}$ , 298 K, 600 MHz.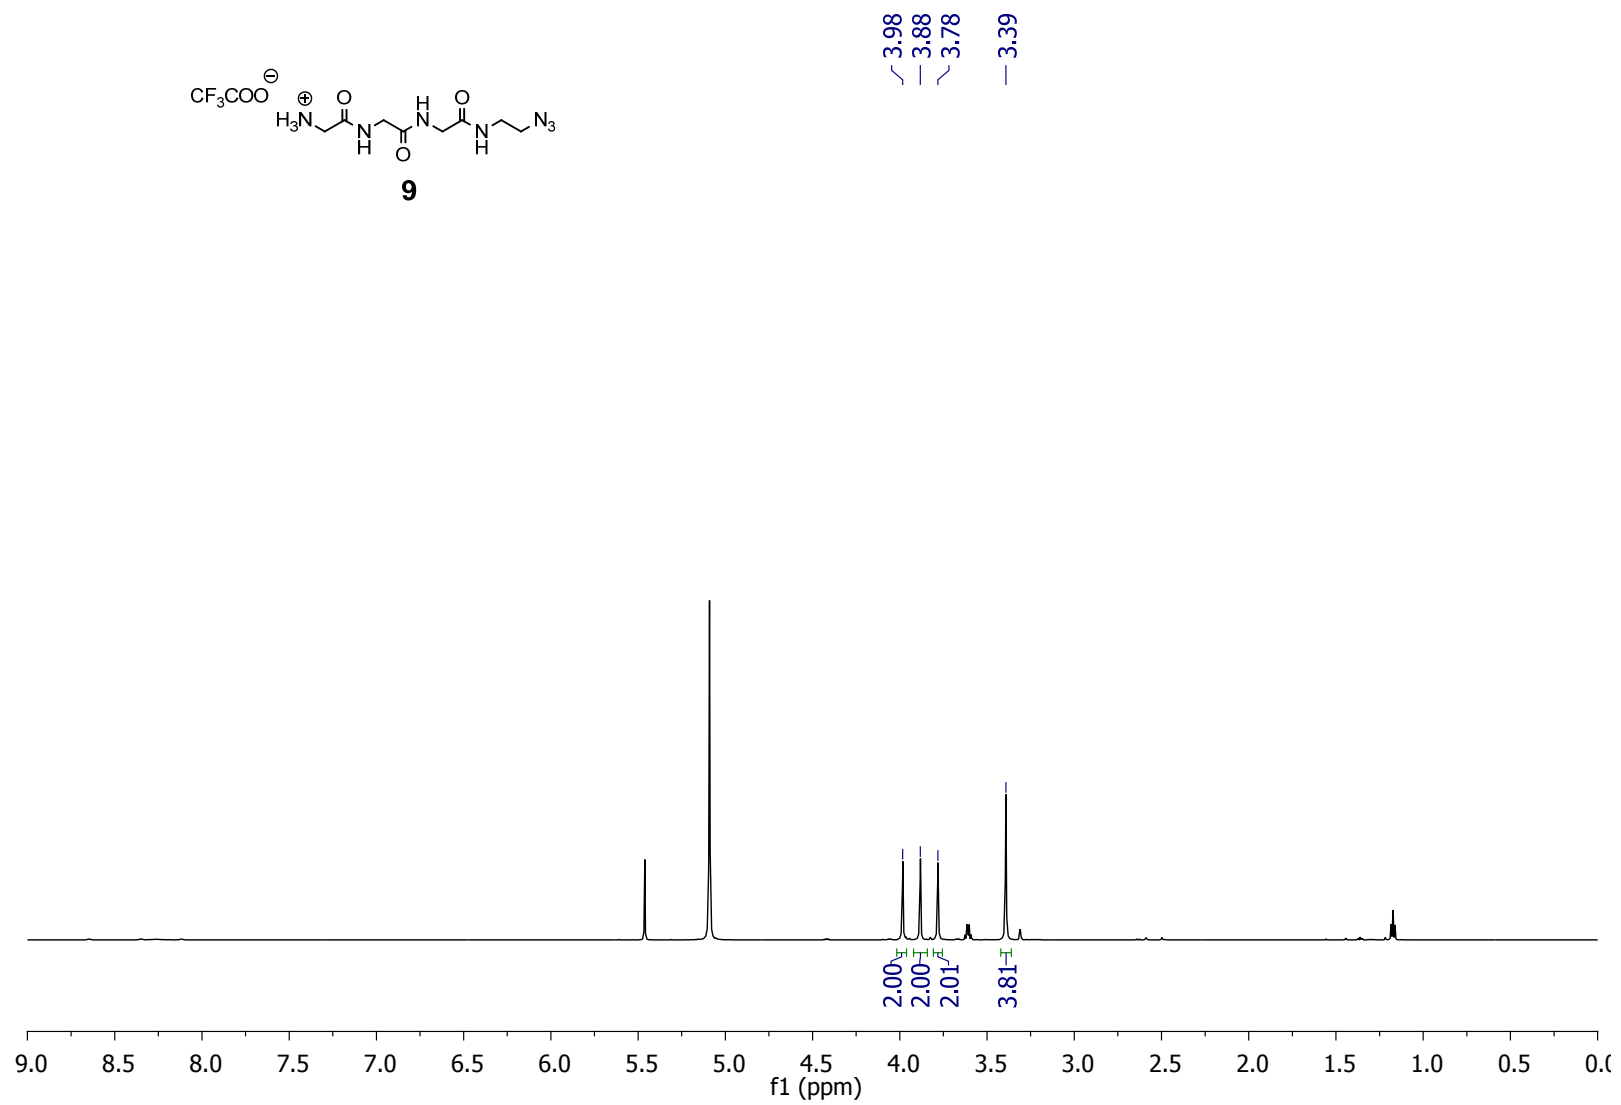

**Figure S4. Compound 9:**  $^{13}\text{C}$ -NMR,  $\text{CD}_3\text{OD}$ , 298 K, 150 MHz.

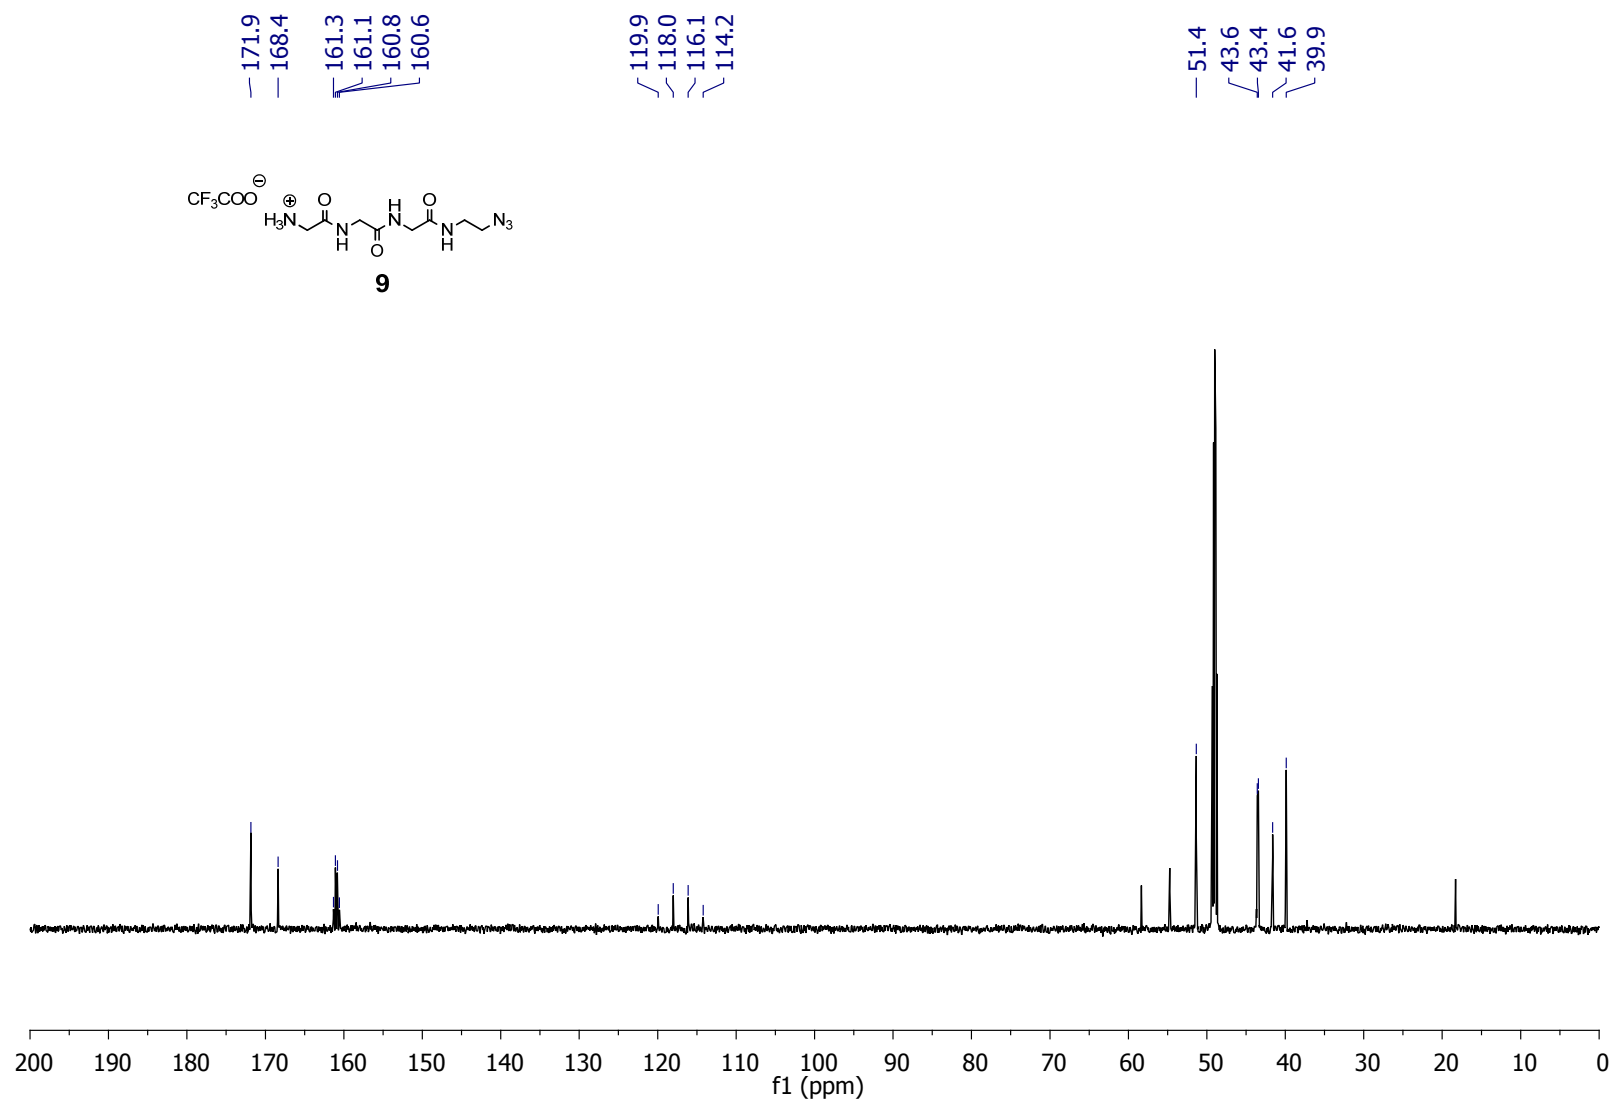

| Age Group | Number of People |
|-----------|------------------|
| 0-14      | 7,040            |
| 15-24     | 7,040            |
| 25-34     | 6,960            |
| 35-44     | 6,960            |
| 45-54     | 6,950            |
| 55-64     | 6,950            |
| 65+       | 6,900            |
| 65+       | 6,890            |
| 65+       | 6,890            |
| 65+       | 6,880            |
| 65+       | 6,880            |
| 65+       | 6,870            |
| 65+       | 4,110            |
| 65+       | 4,040            |
| 65+       | 3,910            |
| 65+       | 3,890            |
| 65+       | 3,830            |
| 65+       | 3,820            |
| 65+       | 3,810            |
| 65+       | 3,810            |
| 65+       | 3,800            |
| 65+       | 3,790            |
| 65+       | 3,690            |
| 65+       | 3,680            |
| 65+       | 3,340            |
| 65+       | 3,310            |

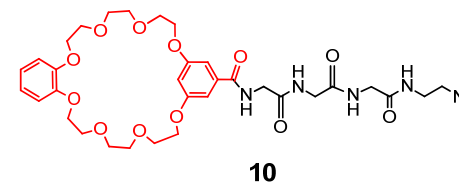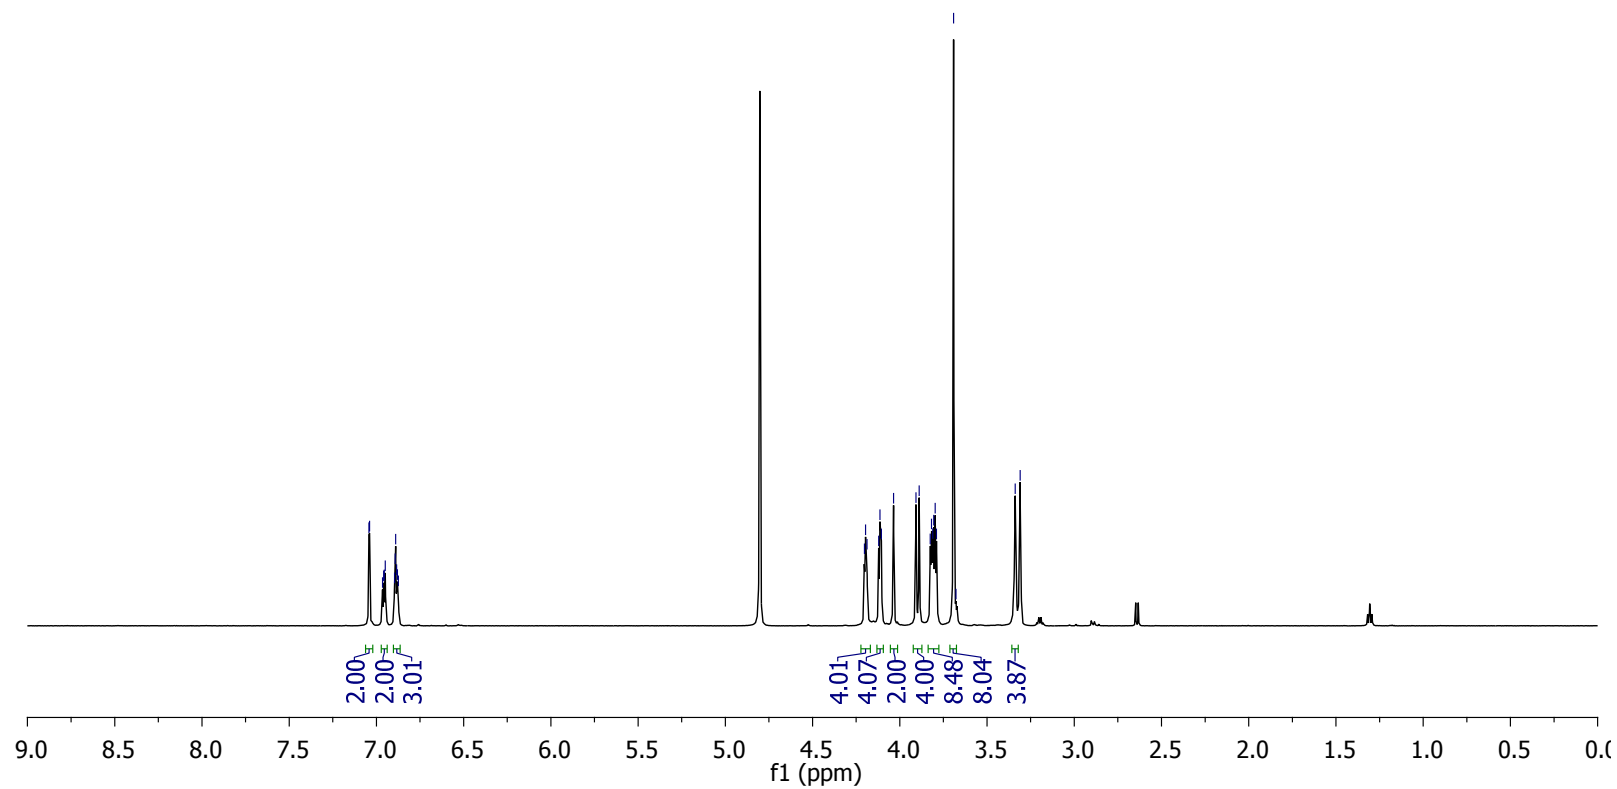

**Figure S6.** Compound **10**:  $^{13}\text{C}$ -NMR,  $\text{CD}_3\text{OD}$ , 298 K, 150 MHz.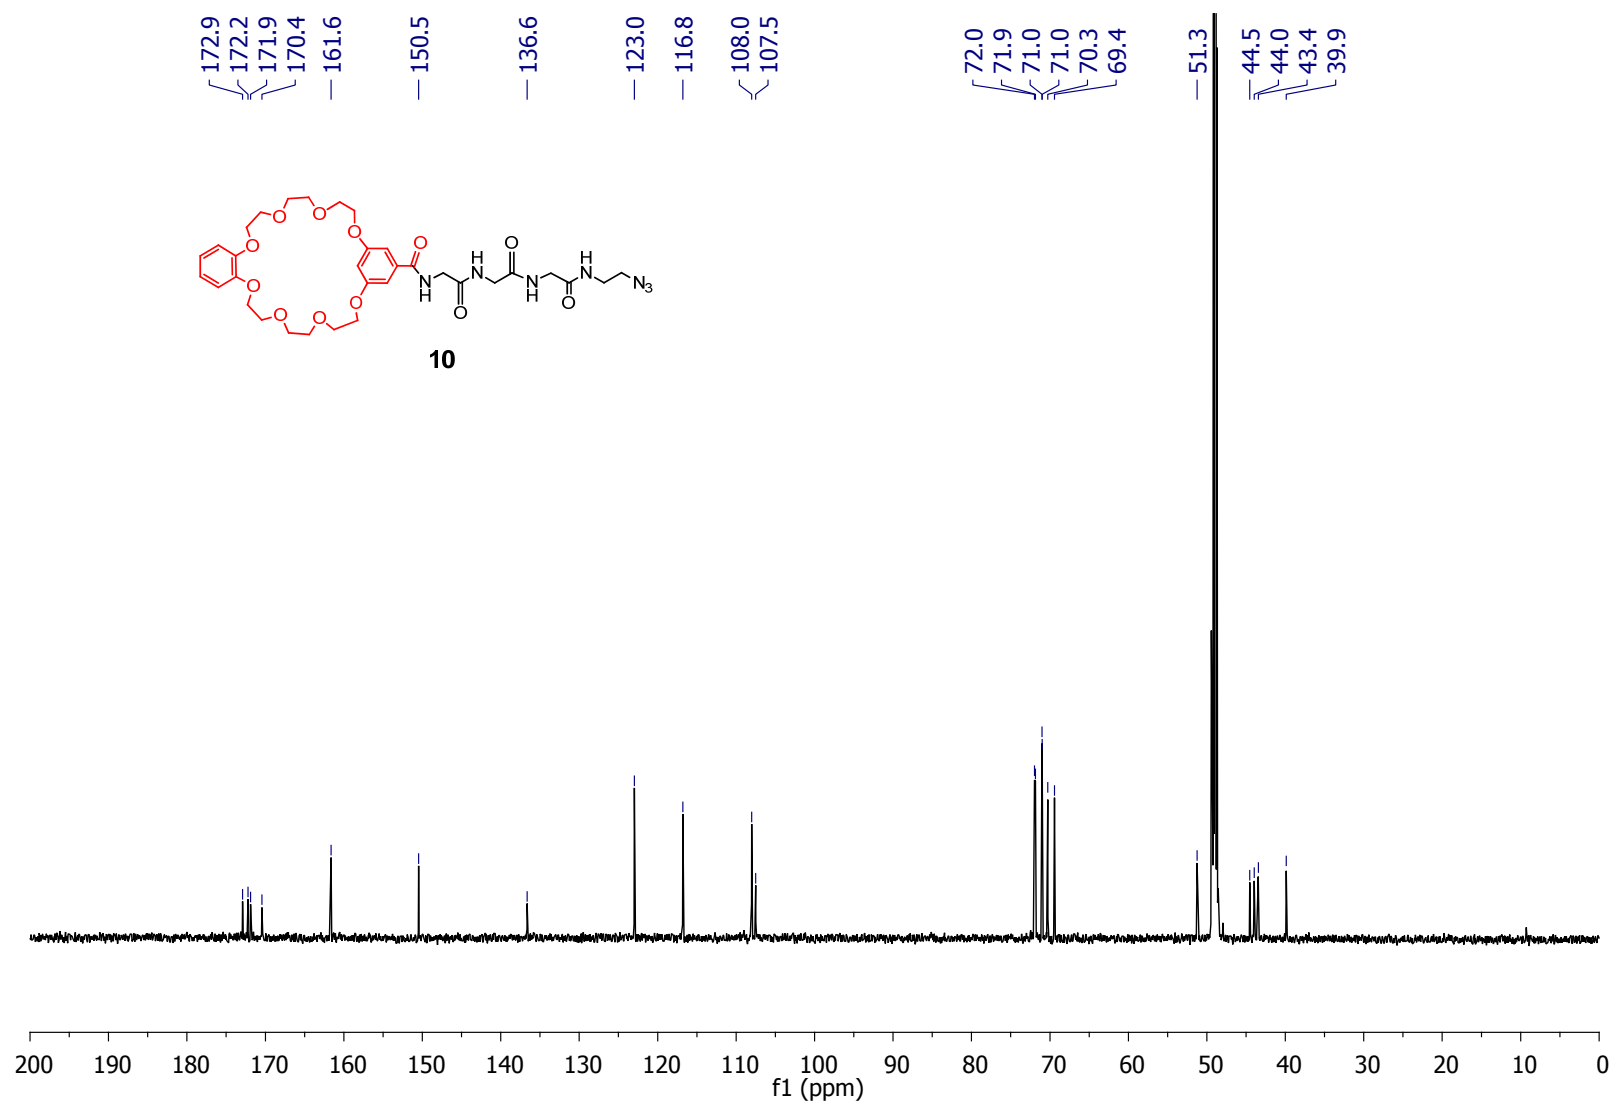

**Figure S7.** Compound **11**:  $^1\text{H}$ -NMR,  $\text{CD}_2\text{Cl}_2$ , 298 K, 600 MHz.

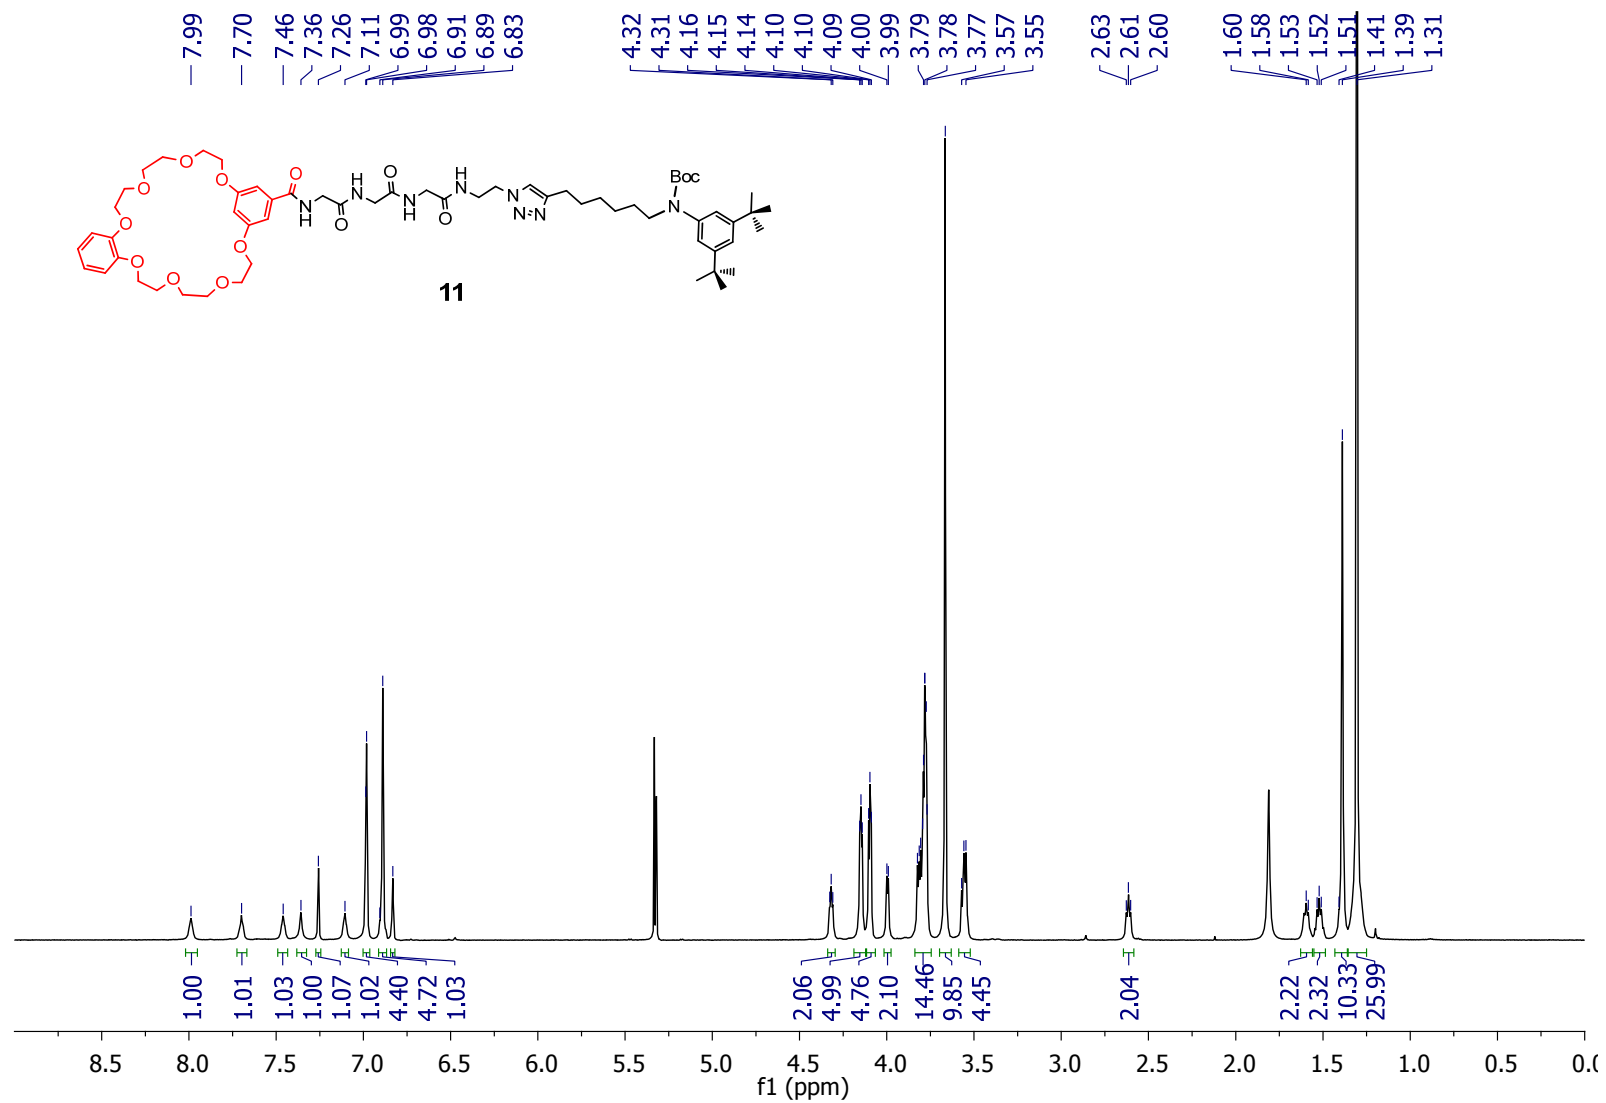

**Figure S8.** Compound 11:  $^{13}\text{C}$ -NMR,  $\text{CD}_2\text{Cl}_2$ , 298 K, 150 MHz.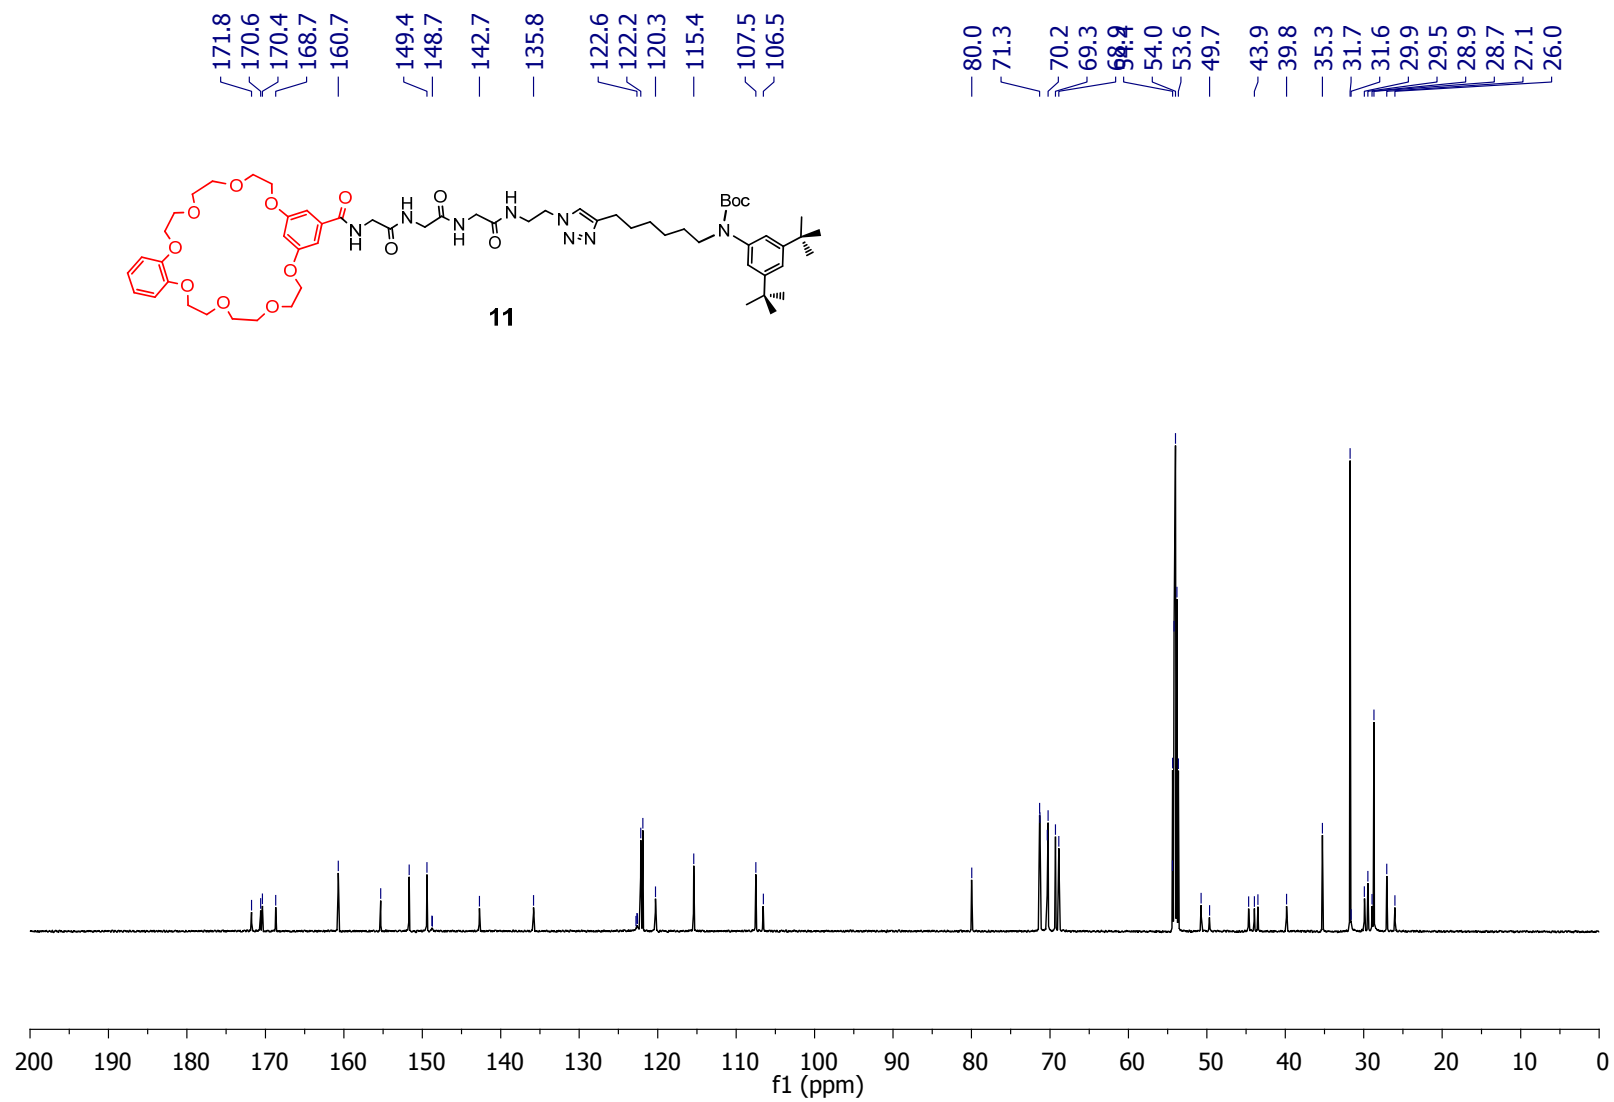

**Figure S9.** Compound **12**+**12u** ( $c = 5.10 \times 10^{-2} \text{ M}$ ):  $^1\text{H}$ -NMR,  $\text{CD}_2\text{Cl}_2$ , 298 K, 600 MHz.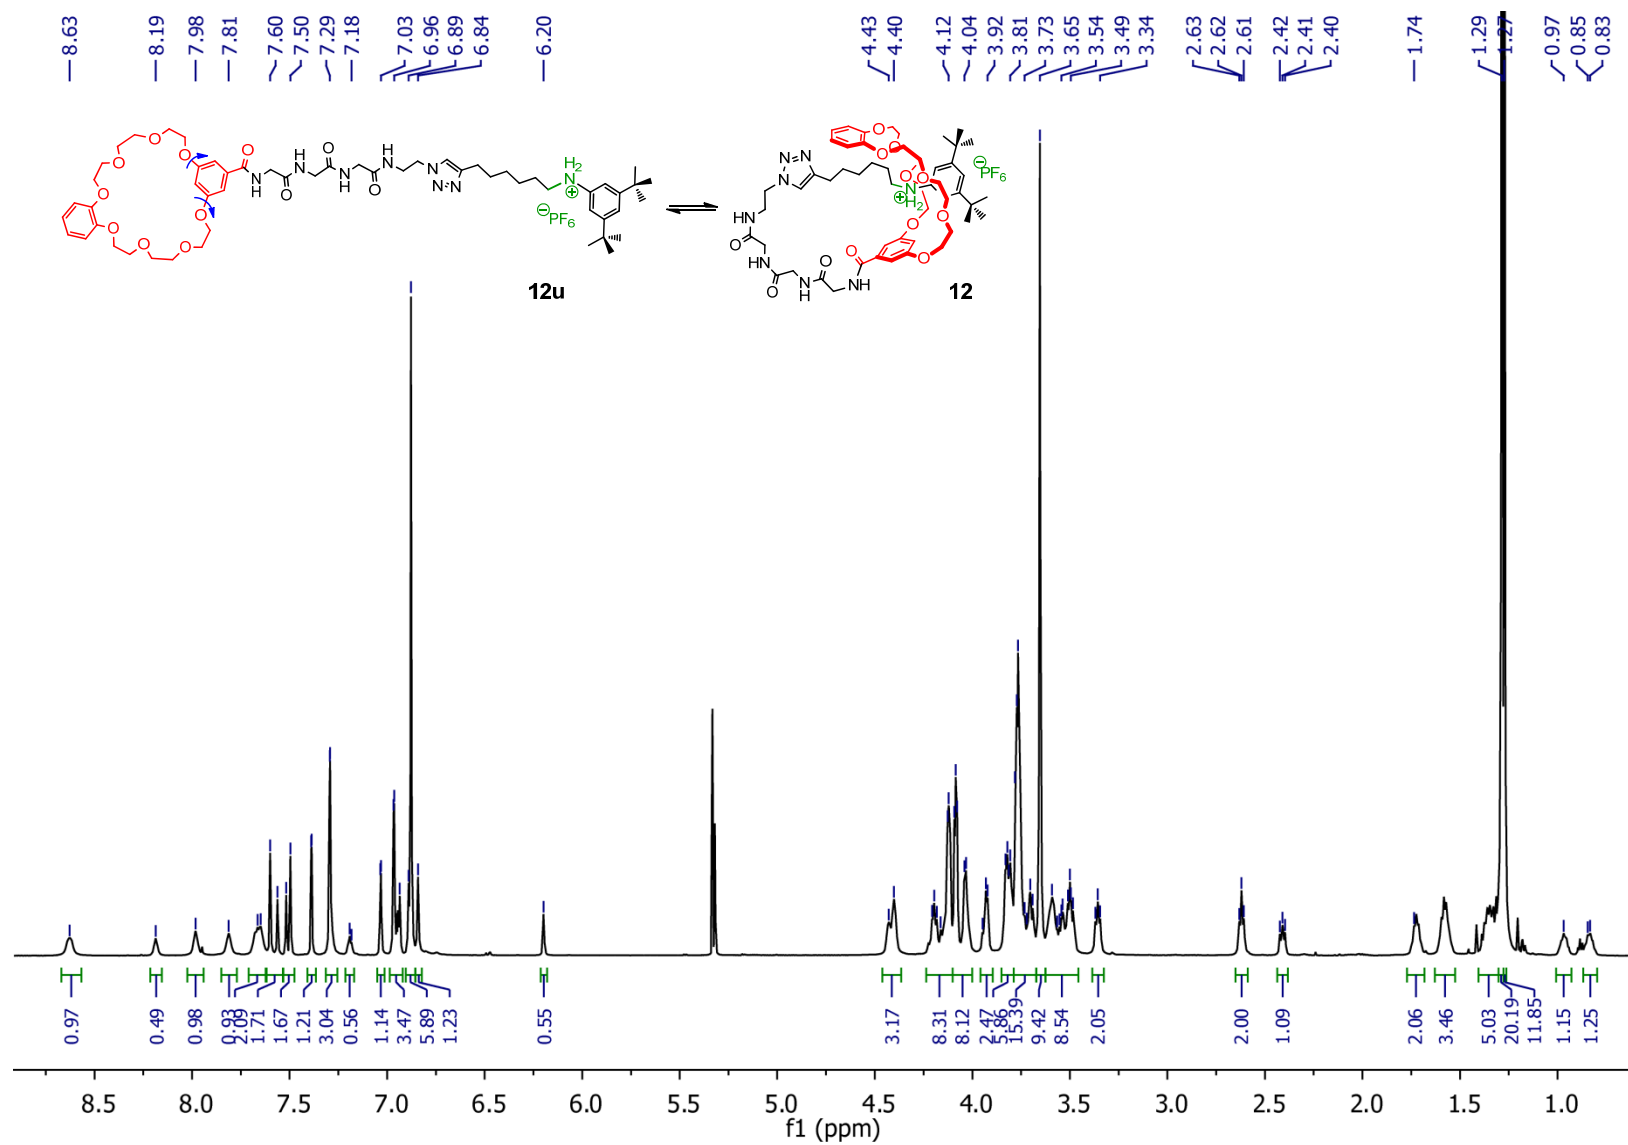

**Figure S10.** Compound **12**+**12u** ( $c = 5 \cdot 10^{-2}$  M):  $^{13}\text{C}$ -NMR,  $\text{CD}_2\text{Cl}_2$ , 298 K, 150 MHz.

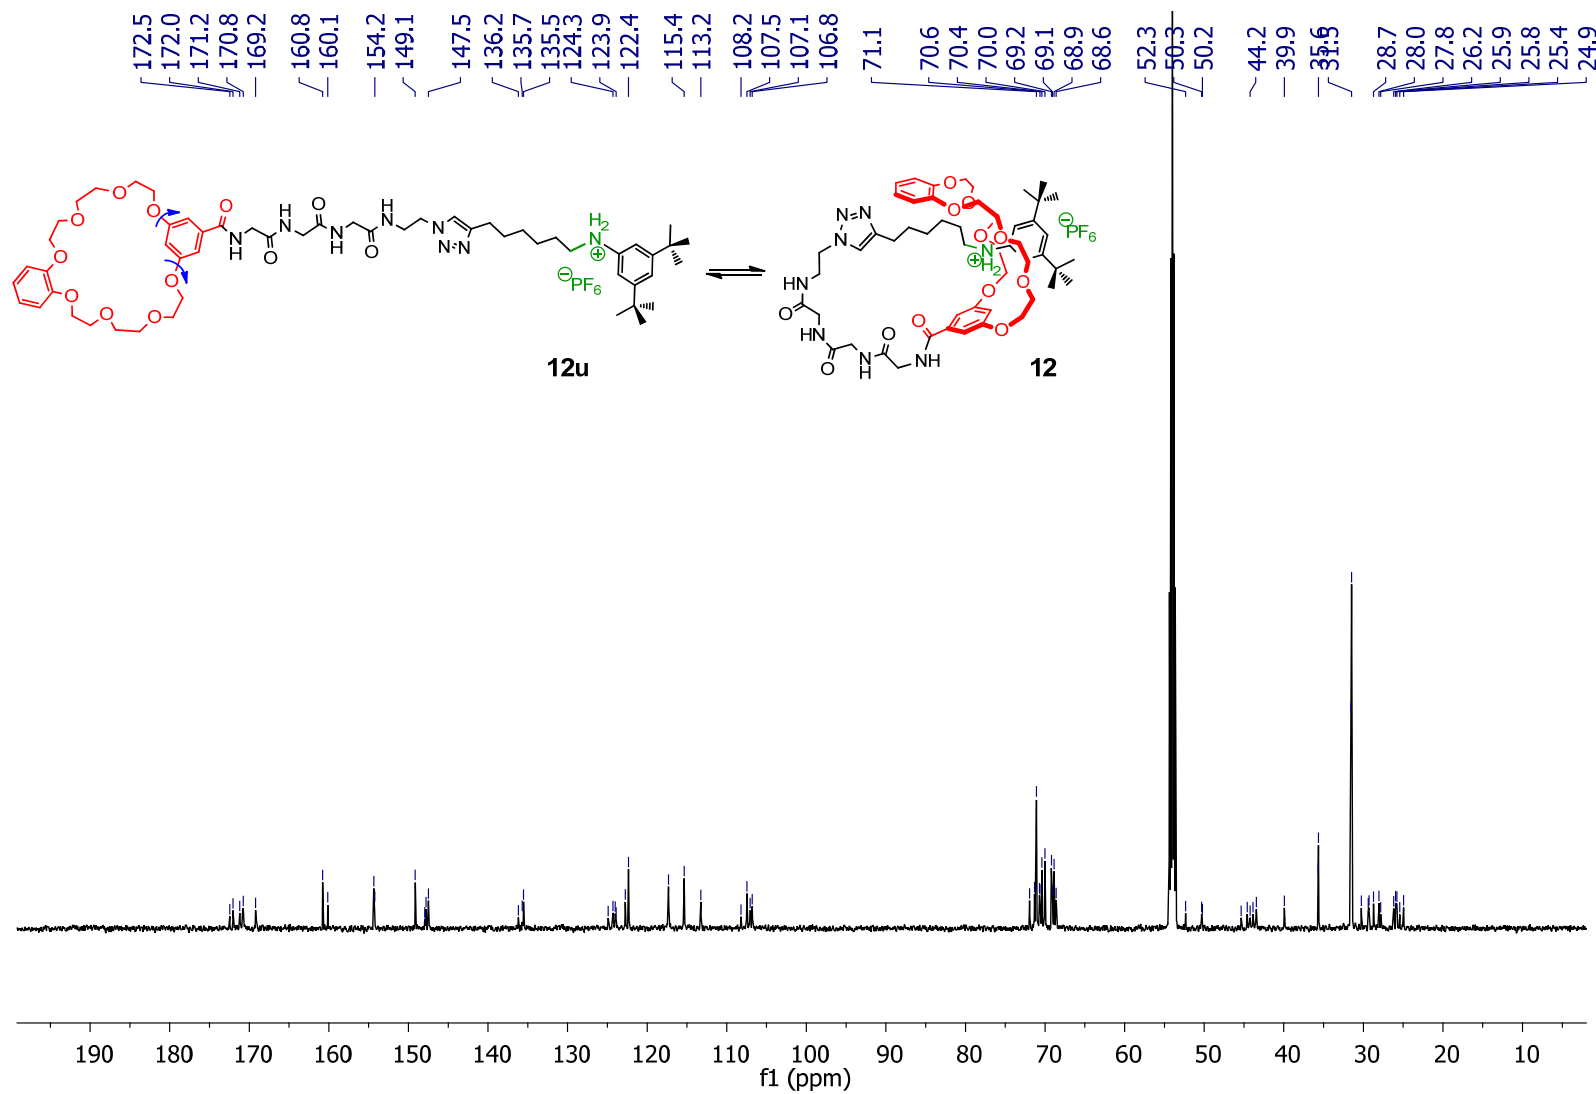

**Figure S11.** Compound **13**:  $^1\text{H}$ -NMR,  $\text{CD}_2\text{Cl}_2$ , 298 K, 600 MHz.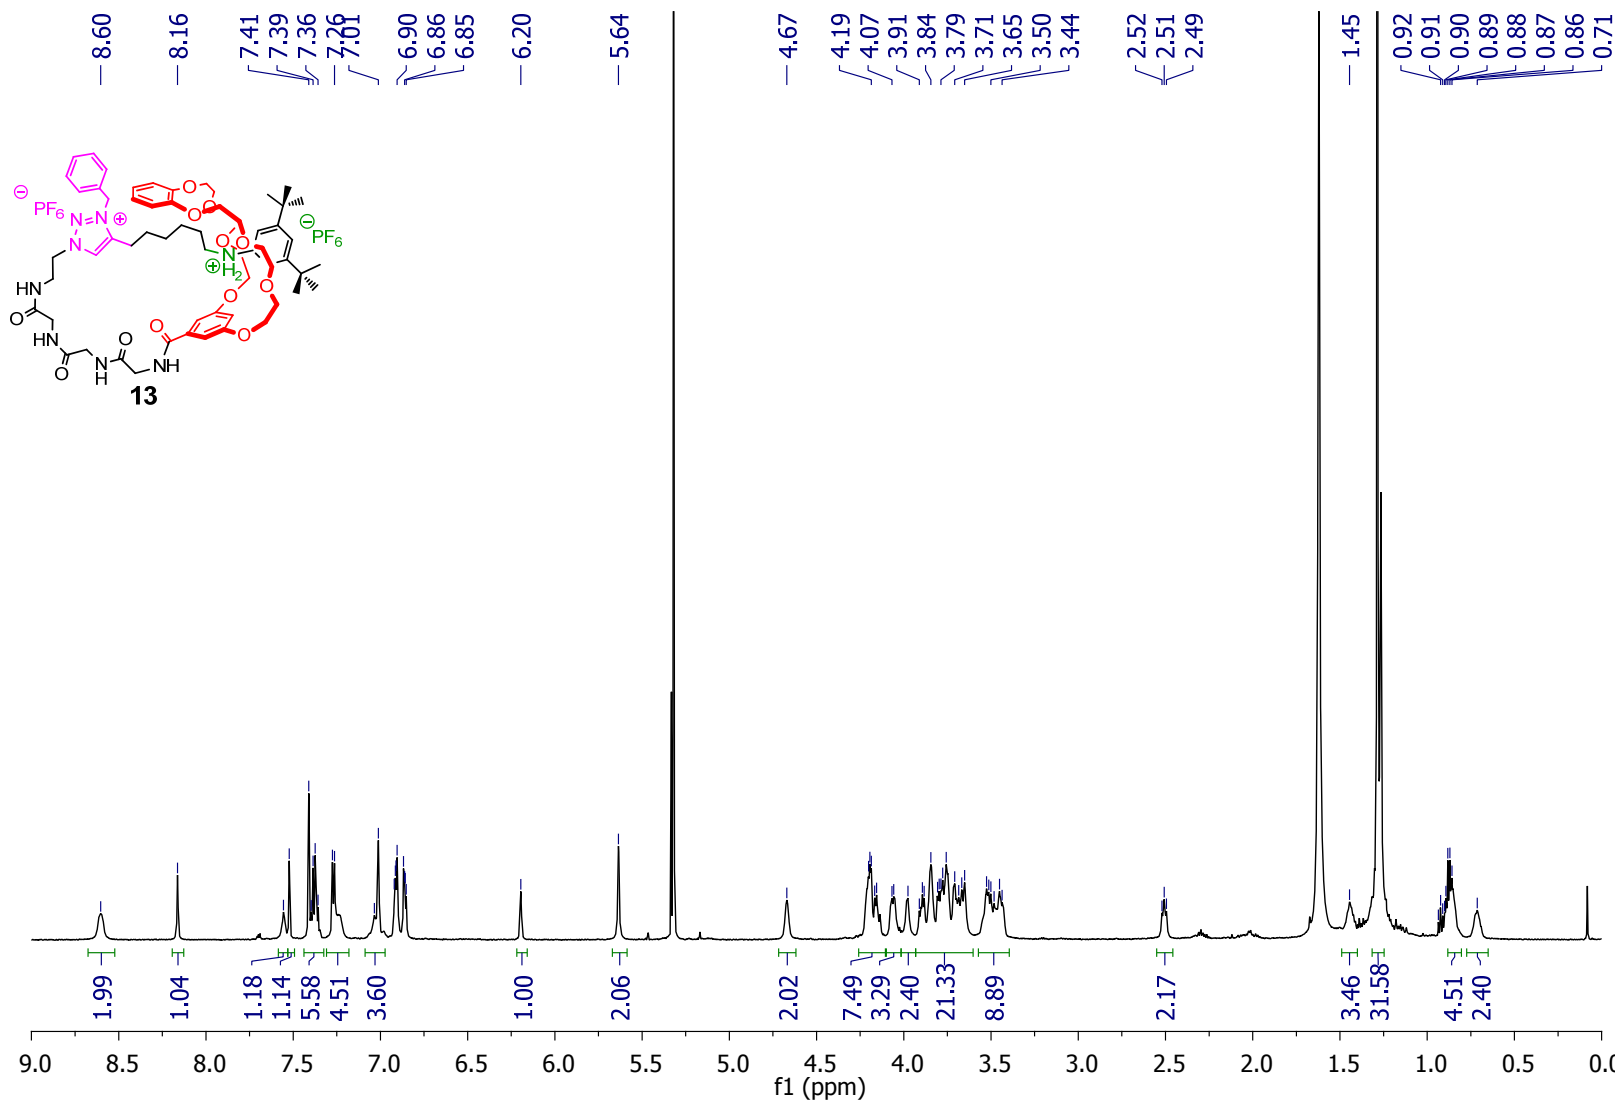

**Figure S12.** Compound **13**: HSQC NMR, CD<sub>2</sub>Cl<sub>2</sub>, 298 K, <sup>1</sup>H at 600MHz–<sup>13</sup>C at 150 MHz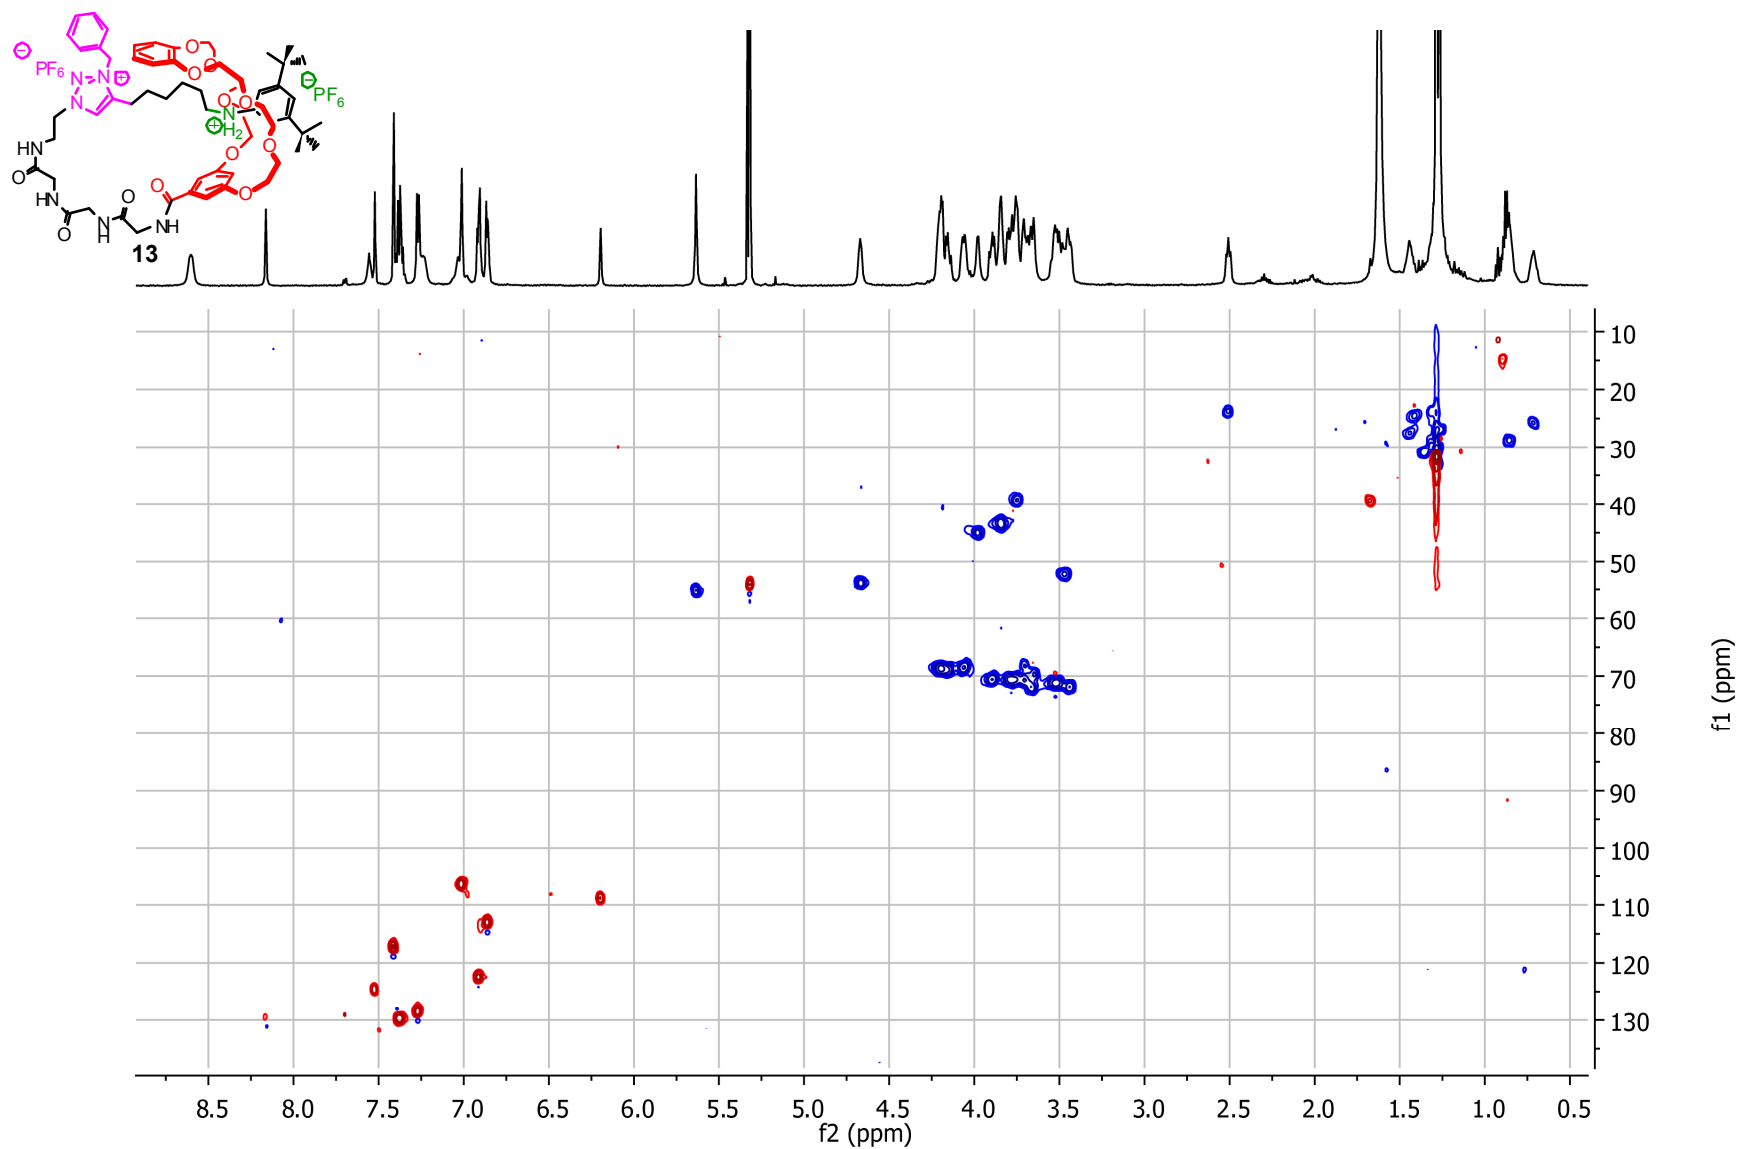

**Figure S13.** Compound **14**:  $^1\text{H}$ -NMR,  $\text{CD}_2\text{Cl}_2$ , 298 K, 600 MHz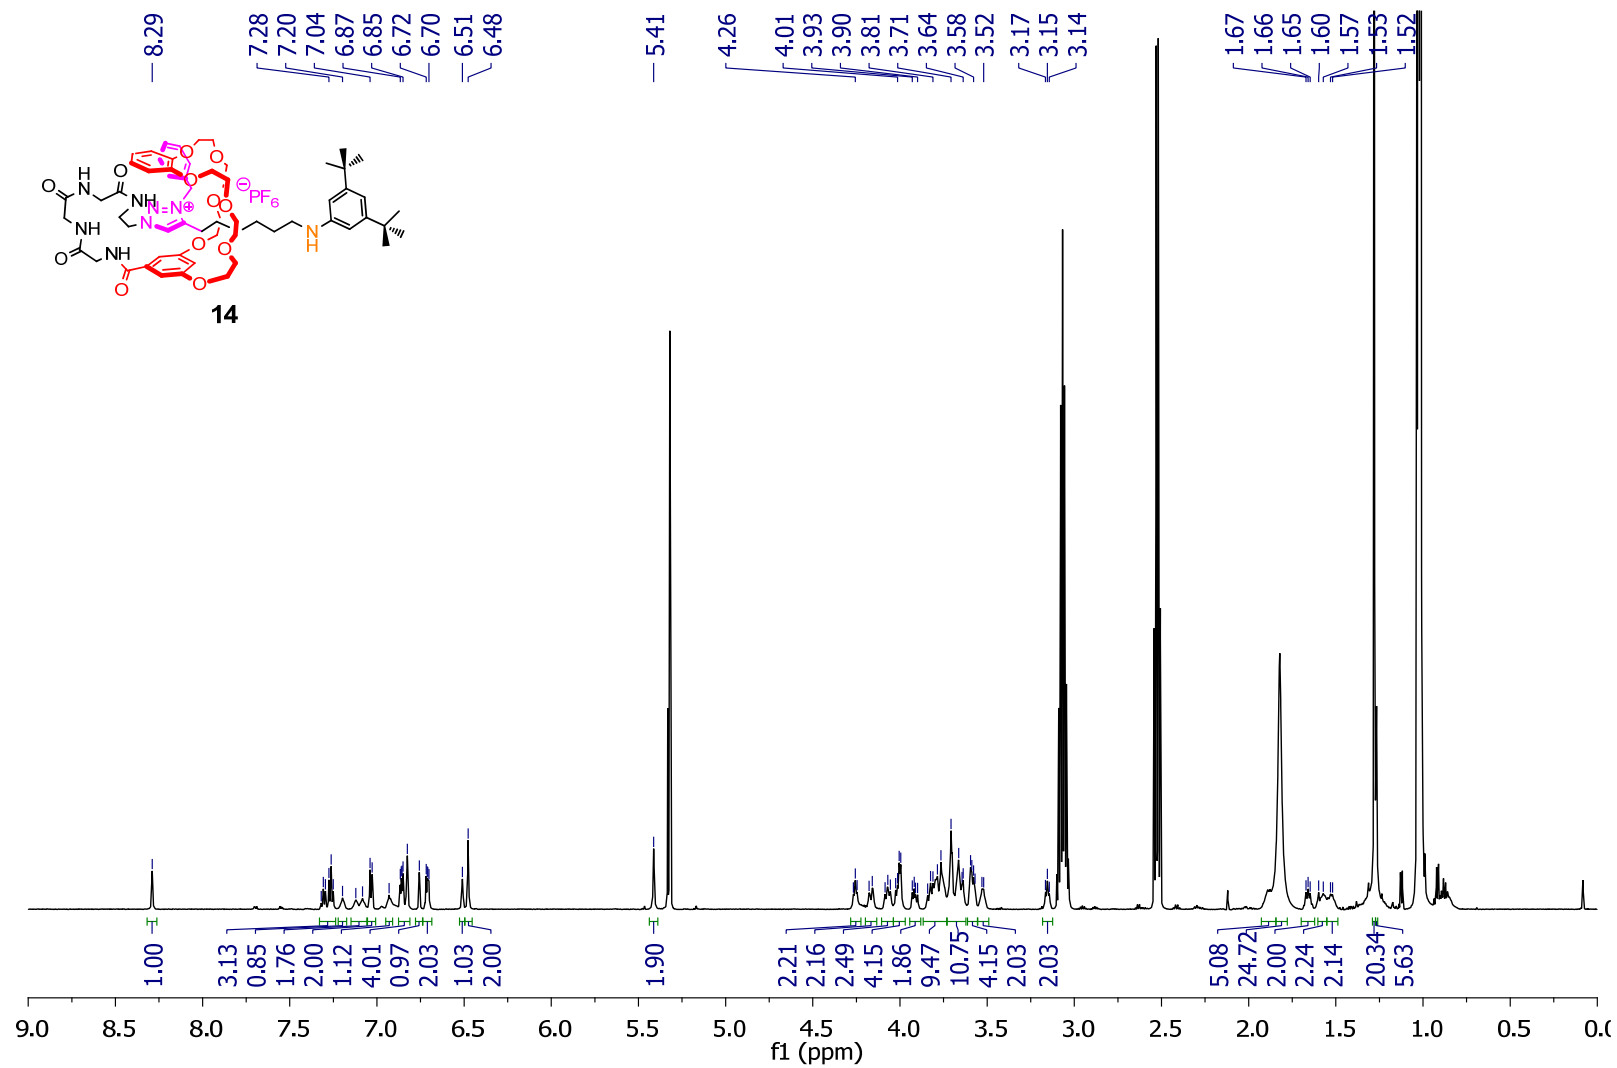

**Figure S14.** Compound **14**: HSQC NMR, CD<sub>2</sub>Cl<sub>2</sub>, 298 K, <sup>1</sup>H at 600 MHz–<sup>13</sup>C at 150 MHz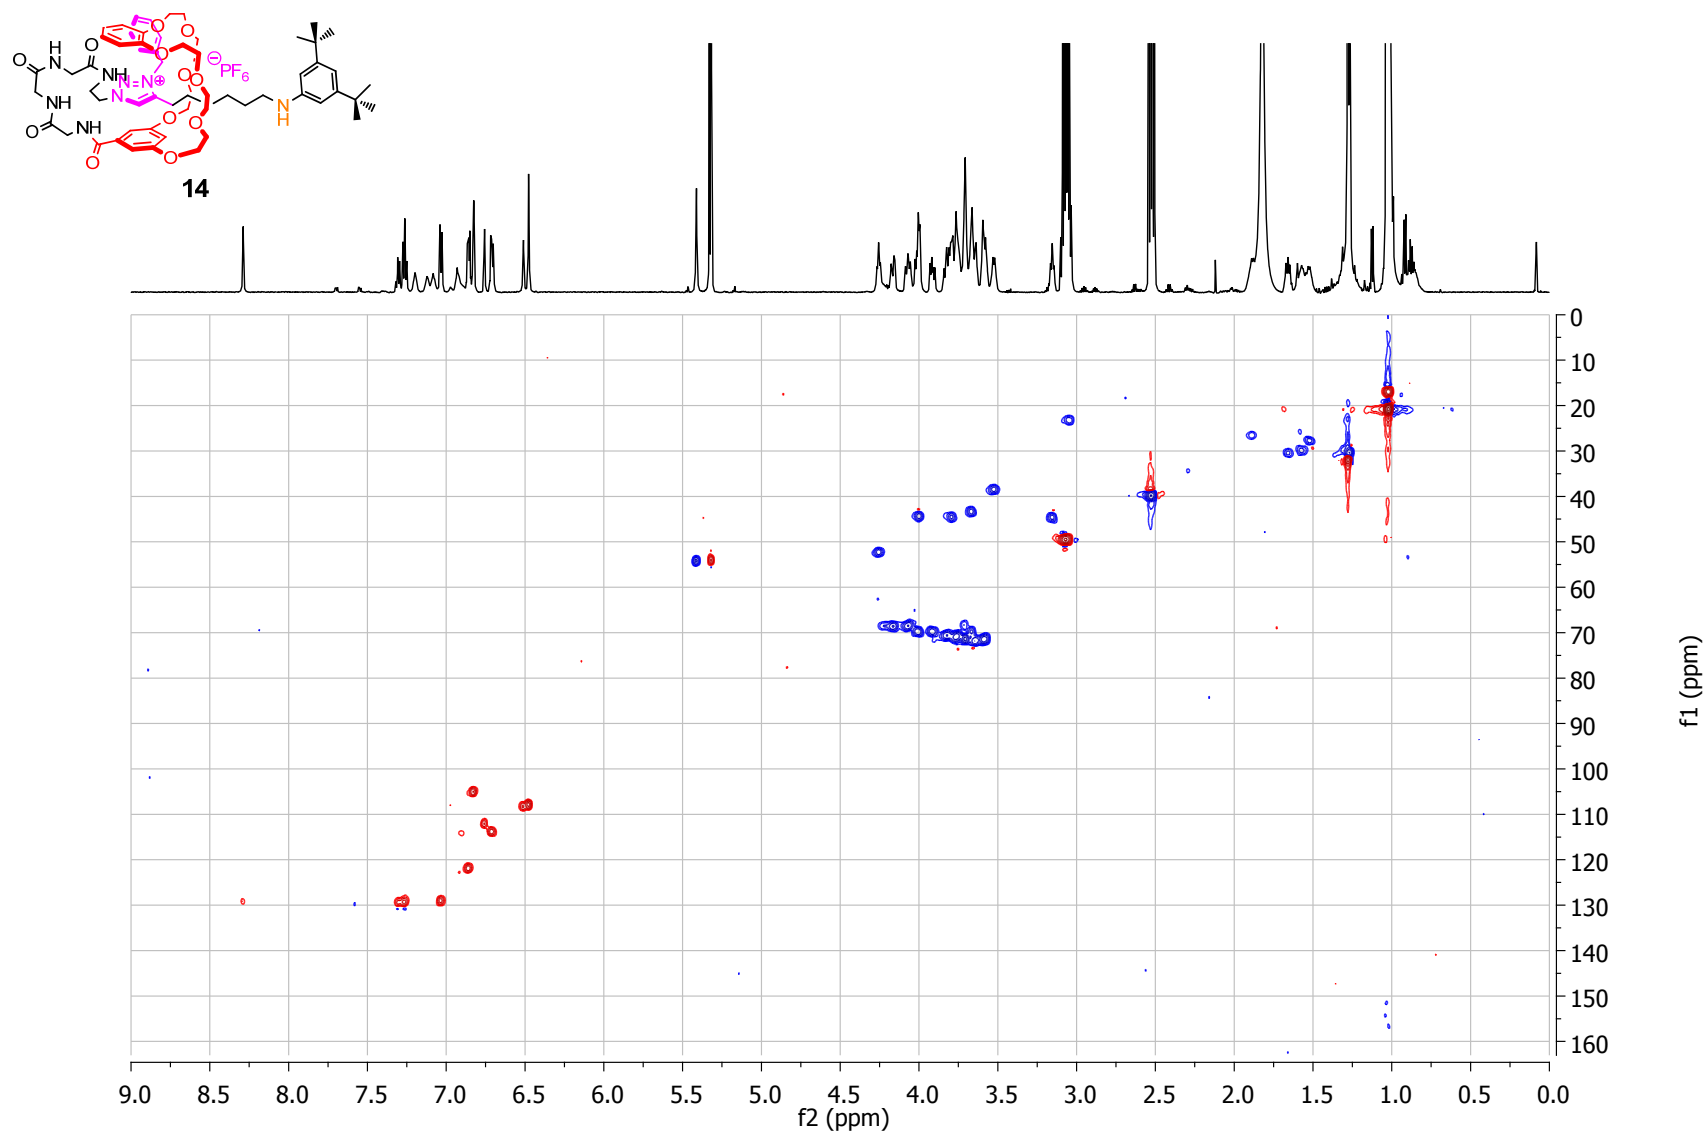

**Figure S15.** Compound **13u**:  $^1\text{H}$ -NMR,  $\text{CD}_2\text{Cl}_2$ , 298 K, 600 MHz.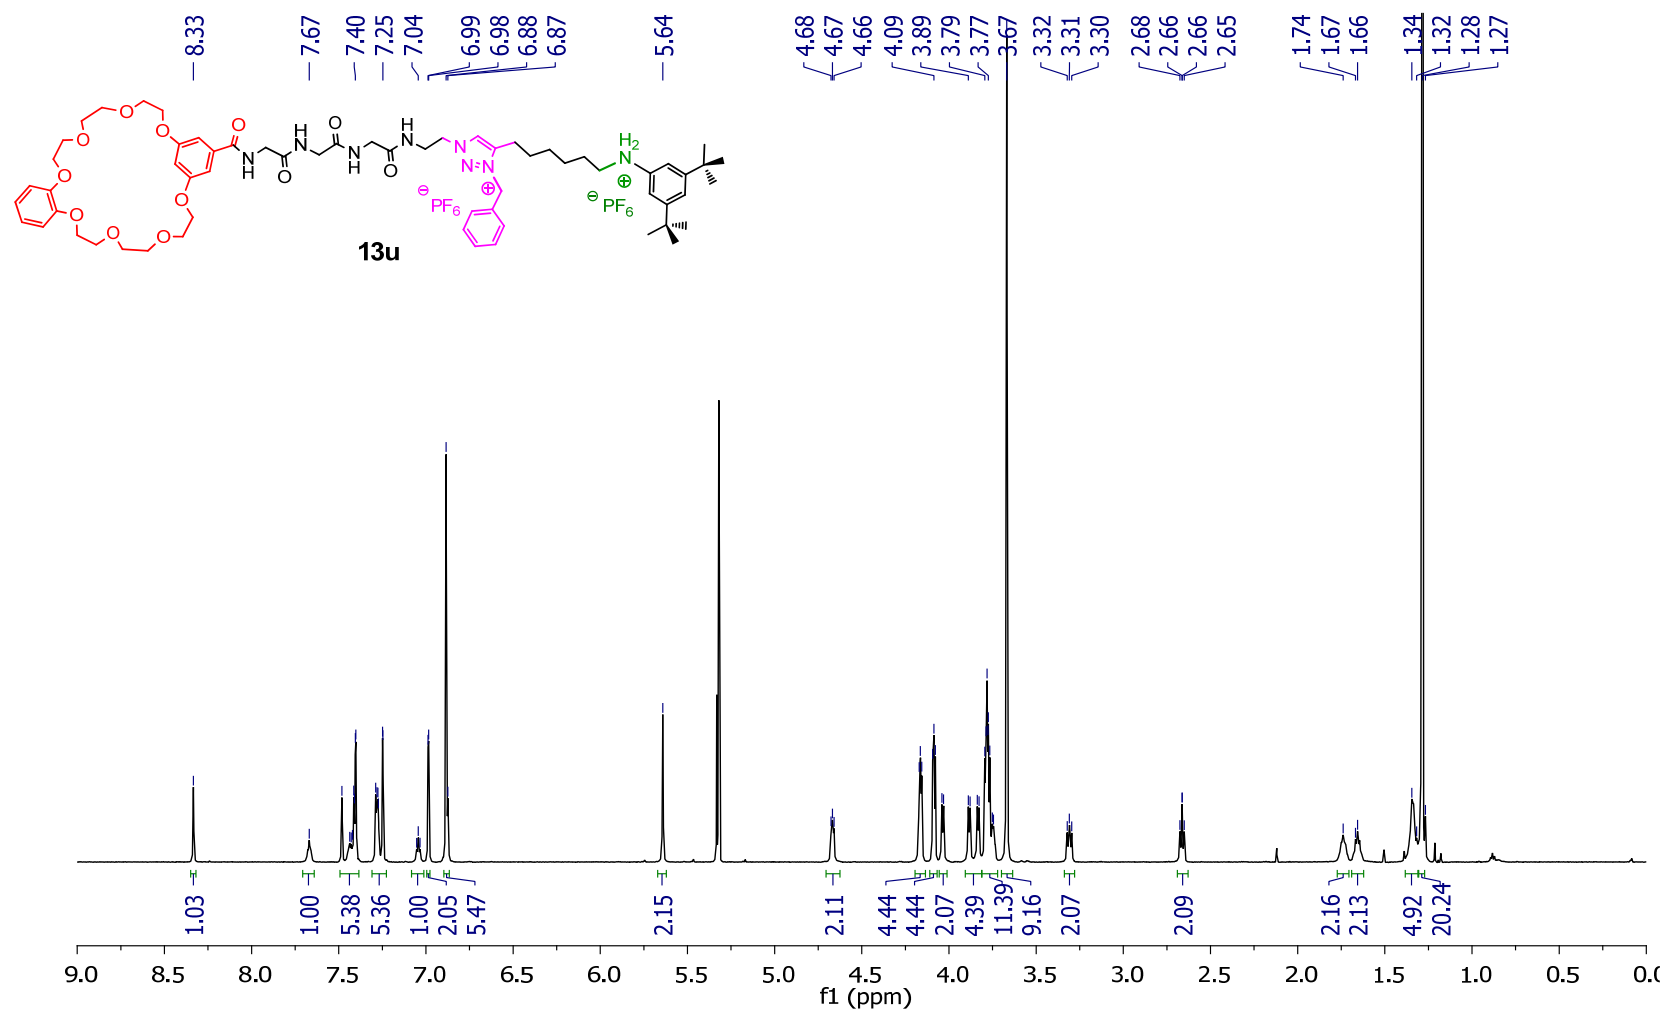

**Figure S16.** Compound **13u**:  $^{13}\text{C}$ -NMR,  $\text{CD}_2\text{Cl}_2$ , 298 K, 150 MHz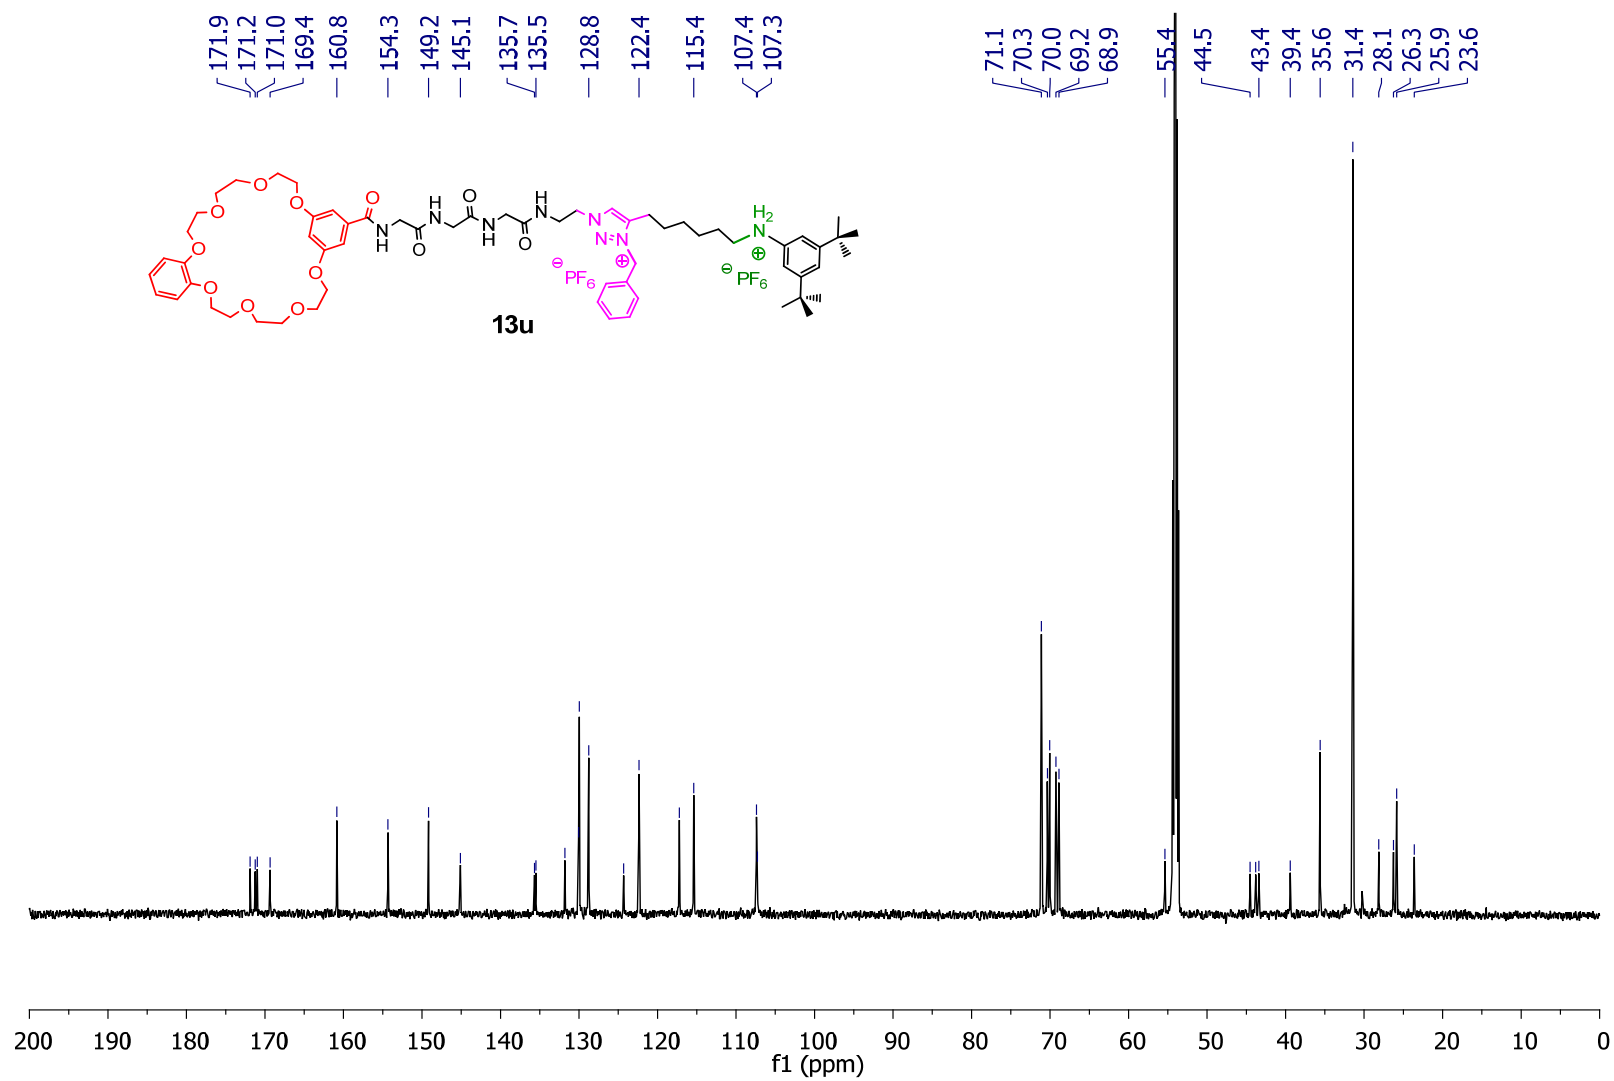

**14u**

<sup>1</sup>H NMR spectrum (CDCl<sub>3</sub>) of compound **14u**. The spectrum displays peaks corresponding to the structure, with chemical shifts (ppm) and integrations indicated.

Chemical structure of **14u** is shown above the spectrum.

Chemical shifts (ppm) and integrations are listed below the spectrum:

| Chemical Shift (ppm) | Integration |
|----------------------|-------------|
| 8.25                 | 1.01        |
| 7.42                 | 5.06        |
| 7.23                 | 2.90        |
| 7.21                 | 0.93        |
| 7.11                 | 7.43        |
| 6.99                 | 1.01        |
| 6.89                 | 2.05        |
| 6.75                 | 2.01        |
| 6.43                 | 1.99        |
| 5.64                 | 4.05        |
| 4.64                 | 4.10        |
| 4.63                 | 1.93        |
| 4.62                 | 12.73       |
| 4.08                 | 10.81       |
| 3.99                 | 2.04        |
| 3.79                 | 2.00        |
| 3.77                 | 4.92        |
| 3.67                 | 5.26        |
| 3.06                 | 4.97        |
| 3.05                 | 22.59       |
| 2.72                 |             |
| 2.71                 |             |
| 2.69                 |             |
| 1.58                 |             |
| 1.28                 |             |

**Figure S18.** Compound **14u**:  $^{13}\text{C}$ -NMR,  $\text{CD}_2\text{Cl}_2$ , 298 K, 150 MHz.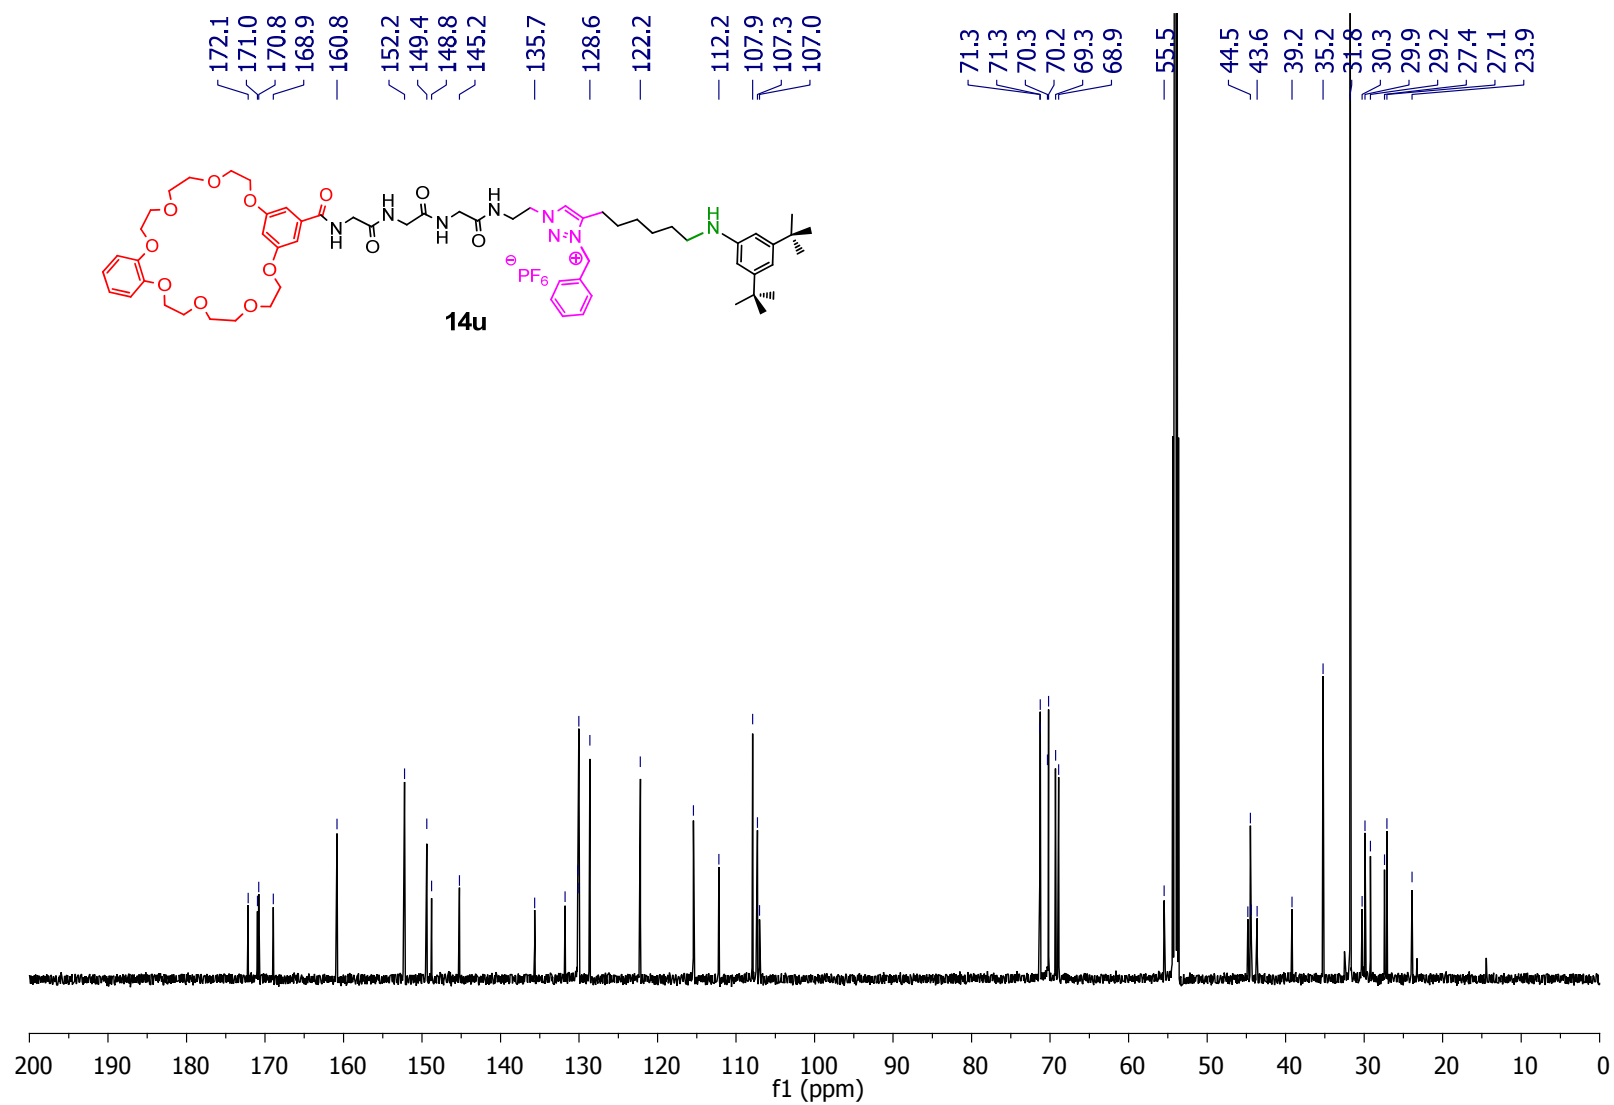

Supplement: Supplementary file 1 [file molecules-18-11553-s001.pdf]
